# Supplementary material for: Valley polarization and magnetic anisotropy of two-dimensional Ni2Cl3I3/MoSe2 heterostructures
Source: Royal Society of Chemistry journal article supplement (doi:10.1039/d4nr01253d), 2024-01-01
Supplement: d4nr01253d1.pdf [file d4nr01253d1.pdf]

*Electronic Supplementary Information for*

**Valley polarization and magnetic anisotropy of two-dimensional  
 $\text{Ni}_2\text{Cl}_3\text{I}_3/\text{MoSe}_2$  heterostructure**

Bo Chen<sup>1</sup>, Baozeng Zhou<sup>1</sup>, Xiaocha Wang<sup>1\*</sup>

<sup>1</sup>*Tianjin Key Laboratory of Film Electronic & Communicate Devices, School of Integrated Circuit*

*Science and Engineering, Tianjin University of Technology, Tianjin 300384, China*

---

\* Author to whom all correspondence should be addressed.

E-mail: [wangxc@email.tjut.edu.cn](mailto:wangxc@email.tjut.edu.cn)

## A. Band structure of $\text{Ni}_2\text{Cl}_3\text{I}_3/\text{MoSe}_2$

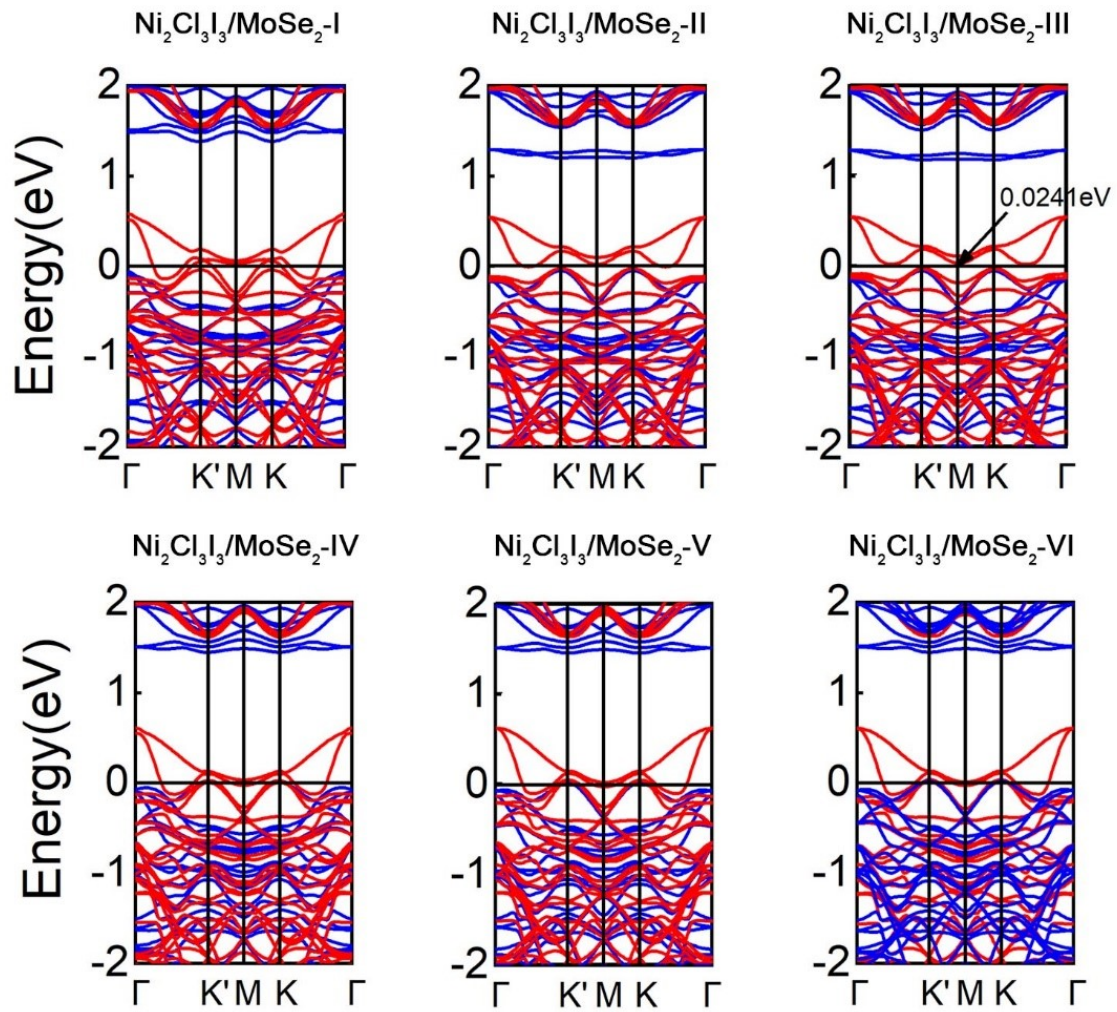

**Fig. S1.** The band structure of  $\text{Ni}_2\text{Cl}_3\text{I}_3/\text{MoSe}_2$  using the PBE+ $U$ .

## B. MAE of Ni<sub>2</sub>Cl<sub>3</sub>I<sub>3</sub>/MoSe<sub>2</sub>-I after applying biaxial strain

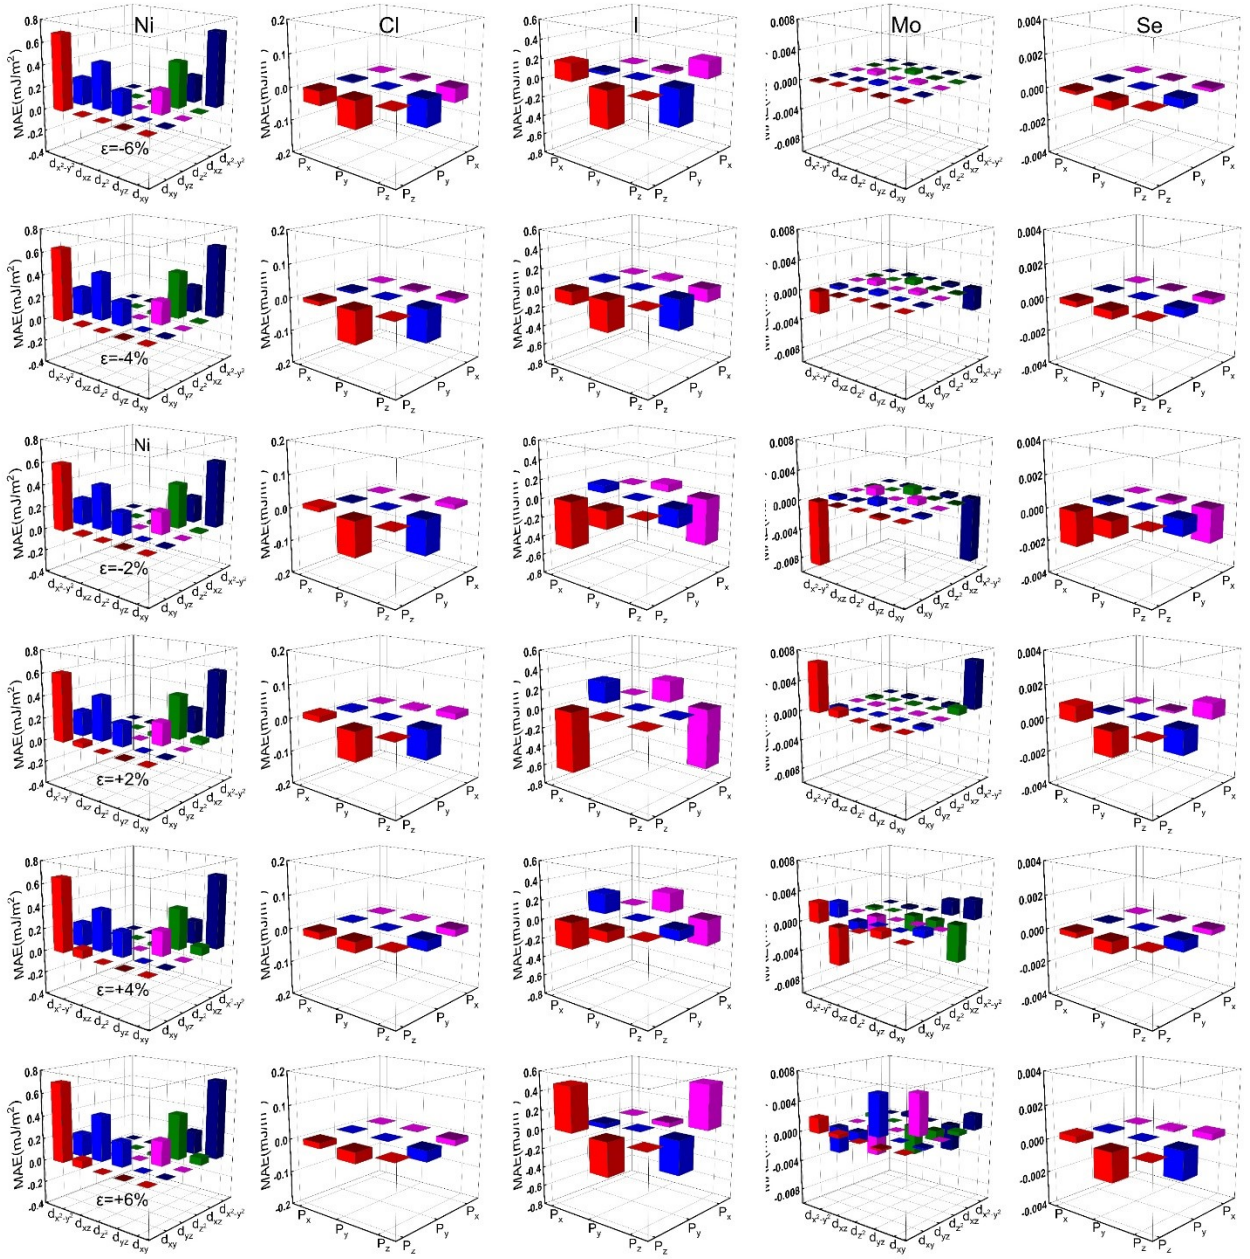

Fig. S2. The MAE of Ni<sub>2</sub>Cl<sub>3</sub>I<sub>3</sub>/MoSe<sub>2</sub>-I after applying biaxial strain.

### C. MAE of Ni<sub>2</sub>Cl<sub>3</sub>I<sub>3</sub>/MoSe<sub>2</sub>- III after applying biaxial strain

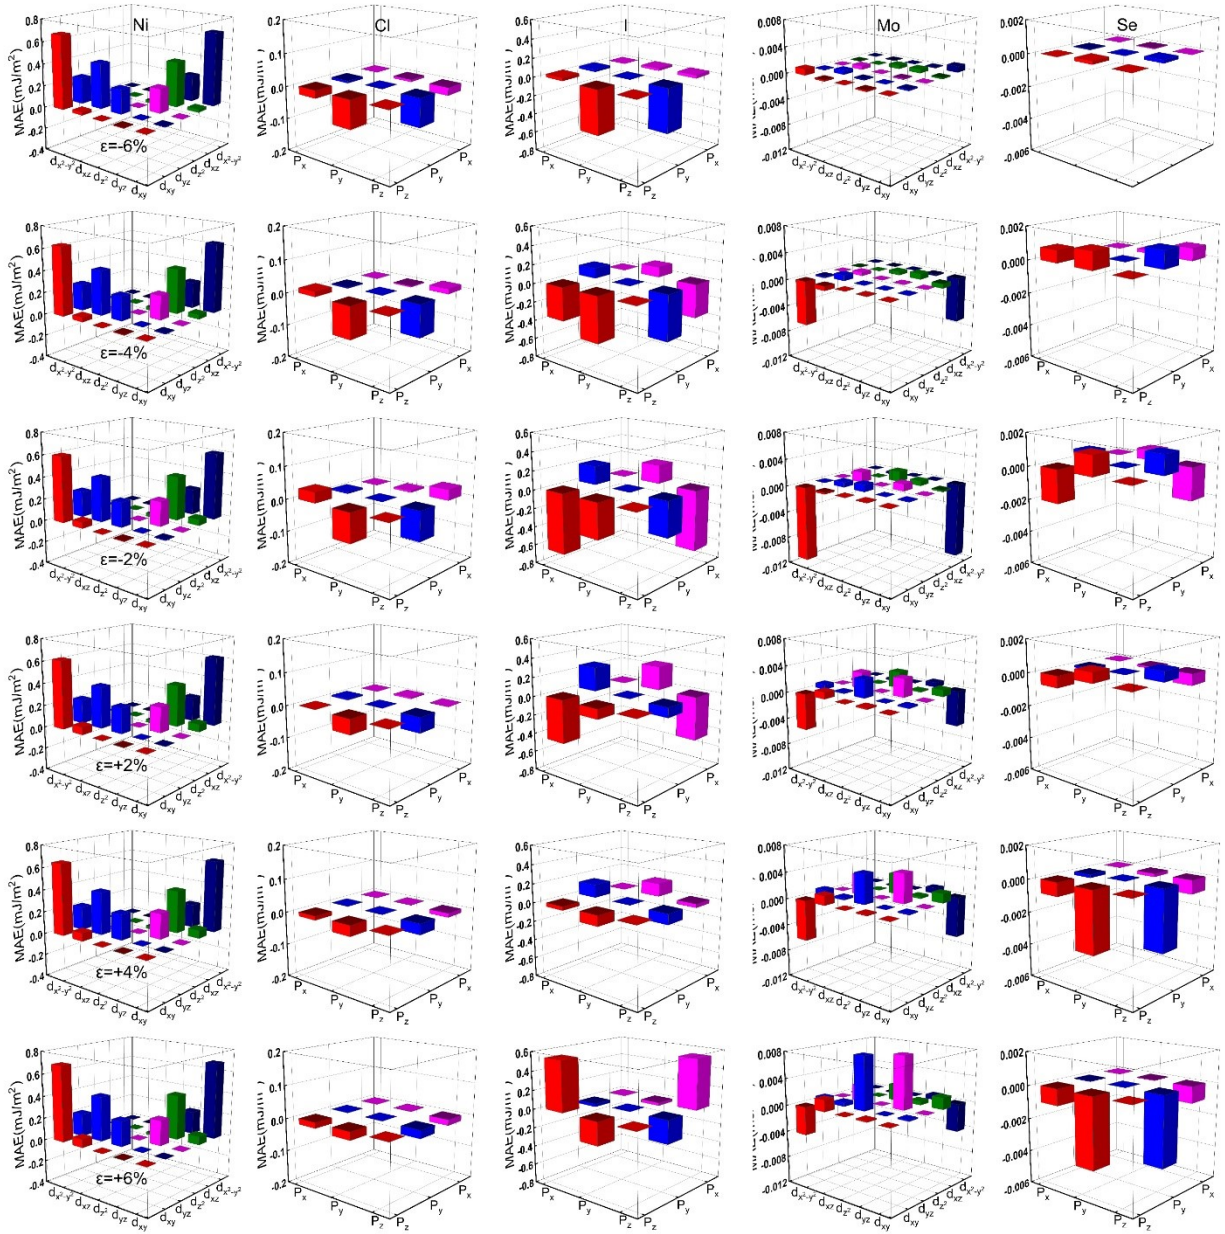

Fig. S3. The MAE of Ni<sub>2</sub>Cl<sub>3</sub>I<sub>3</sub>/MoSe<sub>2</sub>- III after applying biaxial strain.

## D. The planar average of electrostatic potential after applying biaxial strain

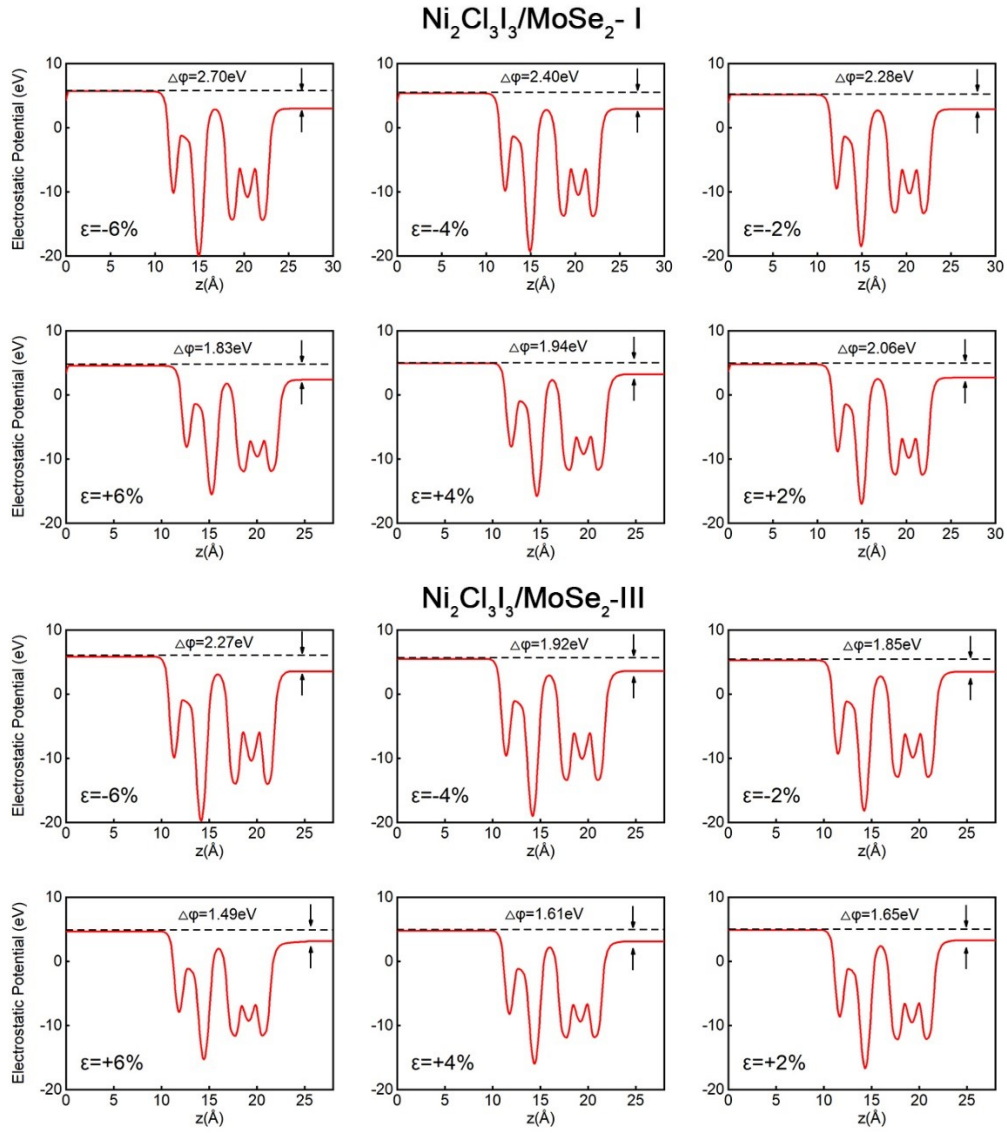

**Fig. S4.** The planar average of electrostatic potential of  $\text{Ni}_2\text{Cl}_3\text{I}_3/\text{MoSe}_2$ -I and III after applying biaxial strain.

## E. The Phonon spectra

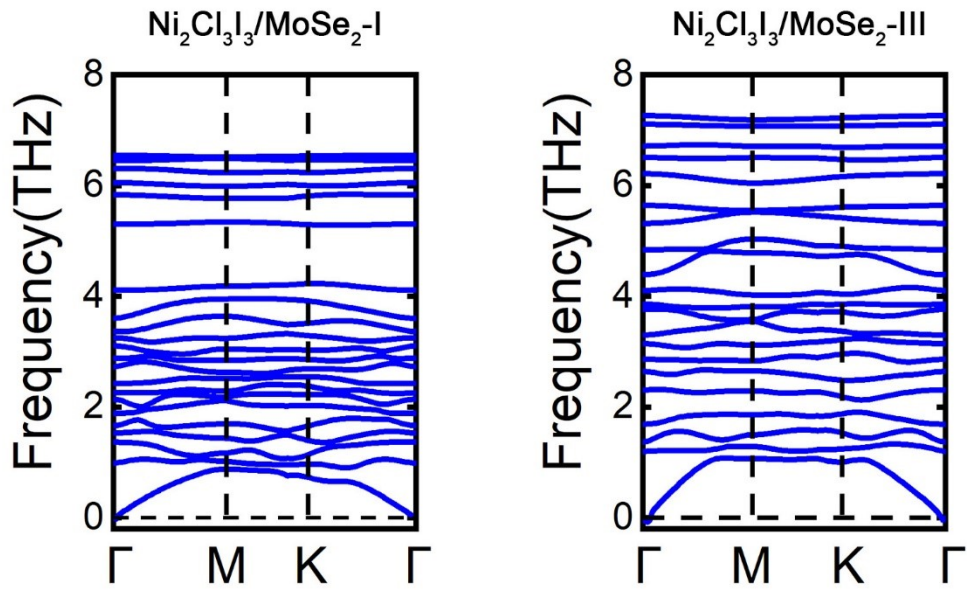

Fig. S5. The Phonon spectra of  $\text{Ni}_2\text{Cl}_3\text{I}_3/\text{MoSe}_2\text{-I}$  and III.
